# Supplementary material for: Design and Psychometric Evaluation of the ‘Clinical Communication Self-Efficacy Toolkit’
Source: MDPI journal article supplement (doi:10.3390/ijerph16224534), 2019-11-16
Supplement: s1 [file s1]

**Supplementary Table A1. Comments for improving readability and understandability**

| Participant or expert code | Tool    | Item and Comment                                                                                                                                                                                                                                              | Action taken                                                                                                              |
|----------------------------|---------|---------------------------------------------------------------------------------------------------------------------------------------------------------------------------------------------------------------------------------------------------------------|---------------------------------------------------------------------------------------------------------------------------|
| E2                         | PCC-SES | <b>Item 3:</b> <i>"I think it is important to reflect in the item that the healthcare professional should always clarify how much time he/she has before starting".</i>                                                                                       | The item was reworded and [...] "before starting a conversation" was added at the end of the item.                        |
| E6                         | PCC-SES | <b>Item 8:</b> <i>"The authors should consider that some untrained people may not be conscious of the fact that they interrupt or influence patient's decisions".</i>                                                                                         | The item was reworded to include the expert's suggestion.                                                                 |
| E10                        | PCC-SES | <b>Item 17:</b> <i>"I would include 'peculiarities' because sometimes is neither the other person's values, beliefs, opinions or concerns that we find difficult to accept, but the little things in the way they express, their tone, their manners...".</i> | The item was reworded to include the expert's recommendation.                                                             |
| E11                        | PCC-SES | <b>Item 4:</b> <i>"By saying 'Ask open questions' you give too much information away and nurses or nursing students may find this task too easy to achieve".</i>                                                                                              | The item was reworded and the term 'open' was substituted for 'right' as suggested by another expert.                     |
| E14                        | PCC-SES | <b>All items:</b> <i>"Please, include a full stop punctuation mark at the end of each item".</i>                                                                                                                                                              | A stop punctuation mark was added at the end of all items as recommended.                                                 |
| E17                        | PCC-SES | <b>Item 4:</b> <i>"Open questions should be changed for right questions to make people think".</i>                                                                                                                                                            | The item was reworded to include the expert's recommendation.                                                             |
| P19                        | PCC-SES | <b>Item 9 and 15:</b> <i>"I found item 9 and item 15 difficult to read".</i>                                                                                                                                                                                  | Item 9 was reworded and commas were added to item 15 to improve its readability.                                          |
| P36                        | PCC-SES | <b>Item 13:</b> <i>"Item 13 is too long to read".</i>                                                                                                                                                                                                         | No changes were applied to this item as it could not be split into two items and none of the information could be removed |
| P40                        | PCC-SES | <b>Item 9:</b> <i>"I do not understand what the word 'feedback' means".</i>                                                                                                                                                                                   | The term 'retroalimentación', which means 'feedback' in Spanish was added to the item.                                    |
| E6                         | ISR-SES | <b>Item 24:</b> <i>"I recommend adding 'own' before 'self' to improve understandability".</i>                                                                                                                                                                 | The item was reworded to include the expert's suggestion.                                                                 |
| E14                        | ISR-SES | <b>All items:</b> <i>"Please, include a full stop punctuation mark at the end of each item".</i>                                                                                                                                                              | A stop punctuation mark was added at the end of all items as recommended.                                                 |
| P5                         | ISR-SES | <b>Item 28:</b> <i>"The 28<sup>th</sup> item is a bit too long and I had to read it various times to understand it".</i>                                                                                                                                      | The item was modified and commas were added to improve its readability.                                                   |
